1 **Spatial modulation of individual behaviors enables collective**  
2 **decision-making during bacterial group migration**

3 Yang BAI<sup>1\*</sup>, Caiyun HE<sup>1,2\*</sup>, Junjia Long<sup>3</sup>, Xuefei Li<sup>1,2</sup>, Xiongfei FU<sup>1,2+</sup>

4 <sup>1</sup>Guangdong Provincial Key Laboratory of Synthetic Genomics, CAS Key  
5 Laboratory for Quantitative Engineering Biology, Shenzhen Institute of Synthetic  
6 Biology, Shenzhen Institutes of Advanced Technology, Chinese Academy of  
7 Sciences, Shenzhen, 518055, China

8 <sup>2</sup>University of Chinese Academy of Sciences, Beijing, 100049, China

9 <sup>3</sup>Yale University, Department of Physics, New Haven, CT 06520-8120, USA

10 \*Yang BAI & Caiyun HE contributed equally to this work.

11 +To whom correspondence should be addressed

12 **Email:** [xiongfei.fu@siat.ac.cn](mailto:xiongfei.fu@siat.ac.cn)

13

14 **Abstract**

15 Coordination of individuals with diversity often requires sophisticated  
16 communications and high-order computational abilities. Microbial populations can  
17 exhibit diverse individualistic behaviors and yet can engage in collective  
18 migratory patterns with a spatially sorted arrangement of phenotypes following a  
19 self-generated attractant gradient. However, it's unclear how individual bacteria  
20 without complex computational abilities can achieve the consistent group  
21 performance and determine their positions in the group while facing  
22 spatiotemporally dynamic stimuli. Here, we investigate the statistics of bacterial  
23 run-and-tumble trajectories during group migration. We discover that, despite of  
24 the constant migrating speed as a group, the individual drift velocity exhibits a  
25 spatially dependent structure that decreases from the back to the front of the  
26 group. The spatial modulation of individual stochastic behaviors constrains cells  
27 in the group, ensuring the coherent population movement with ordered patterns  
28 of phenotypes. These results reveal a simple computational principle for  
29 emergent collective behaviors from heterogeneous individuals.

30

31

## 32 Introduction

33

34 Collective group migration as an important class of coordinated behaviors is  
35 ubiquitous in living systems, such as navigation, foraging, and range expansion  
36 (Krause, Ruxton et al., 2002, Partridge, 1982, Sumpter, 2010). In the presence of  
37 individual heterogeneity, the migrating group often exhibit spatially ordered  
38 arrangements of phenotypes (Krause et al., 2002, Parrish & Edelstein-Keshet,  
39 1999, Partridge, 1982, Sumpter, 2010). In animal group migration, individual  
40 behavioral abilities (e.g. directional-sensitive) would result social hierarchy, which  
41 further drives the spatial arrangement in coordinated group (Couzin, Krause et  
42 al., 2005). At the same time, the spatial arrangements can lead to different costs  
43 and benefits for the individuals participating in the group migration (Krause, 1994,  
44 Parrish & Edelstein-Keshet, 1999, Partridge, 1982). Participating individuals must  
45 follow disciplinary rules to organize themselves into coordinated patterns while  
46 on the move, which requires complex computational abilities to interact with the  
47 group and the environment (Couzin & Krause, 2003, Couzin, Krause et al.,  
48 2002, Vicsek & Zafeiris, 2012). Therefore, understanding how individuals of  
49 different phenotypes determine their group positions is an essential prerequisite  
50 to uncover the organization principles of collective populations.

51 The chemotactic microbe, *E. coli*, provides a simple model to address the  
52 emergence of collective decision-making, as it can both exhibit individualistic  
53 behaviors (Dufour, Gillet et al., 2016, Frankel, Pontius et al., 2014, Kussell &  
54 Leibler, 2005, Waite, Frankel et al., 2016, Waite, Frankel et al., 2018) and  
55 collective migratory patterns (Adler, 1966a, Fu, Kato et al., 2018, Keller & Segel,  
56 1971, Wolfe & Berg, 1989). Individual cells perform run-and-tumble random  
57 motions by spontaneous switching the rotating direction of flagella (Berg, 2004,  
58 Berg & Brown, 1972). The cell can facilitate the chemotaxis pathway to control  
59 the switching frequency to bias in its favorable directions towards the  
60 chemoattractant gradient, where the efficiency to climb the gradient is defined as  
61 chemotactic ability ( $\chi$ ) (Celani & Vergassola, 2010, de Gennes, 2004, Dufour, Fu  
62 et al., 2014, Si, Wu et al., 2012). In addition, substantial phenotypic heterogeneity  
63 in chemotactic ability has been observed even for clonal bacterial population,  
64 which diversifies the chemotactic response of cells to identical signals (Spudich &  
65 Koshland, 1976, Waite et al., 2016, Waite et al., 2018). At the same time, despite  
66 of the stochastic solitary behavior and variations in phenotypic ability, *E. coli*  
67 population can migrate as a coherent group by following a self-generated  
68 attractant gradient (via consumption) (Adler, 1966a, Saragosti, Calvez et al.,  
69 2011, Wolfe & Berg, 1989). The group moving at a constant speed form a stable  
70 pattern of phenotypes sorted by their chemotactic abilities (Fig 1A), so as to  
71 maintain phenotypic diversity in the coherent migratory group (Fu et al., 2018,  
72 Waite et al., 2018). Intriguingly, it's believed that there are no direct  
73 communications among cells within such coordinated migration group (Cremer,  
74 Honda et al., 2019, Fu et al., 2018), and cells encounter highly dynamic external  
75 stimulus. How individuals with phenotypic and behavioral variations manage to

76 maintain the consistent group performance and determine their relative positions  
77 in the group is still a mystery.

78 Here we analyzed bacterial trajectories in the chemotactic group migration using  
79 a microfluidic system that enables us to simultaneously characterize the  
80 quantitative properties of individual motions (see Materials and Methods). We  
81 discovered that in the collectively migratory group, the run-and-tumble motions of  
82 individual cells were spatially modulated to behave as mean-reverting processes  
83 relative to the group, i.e. cells effectively tend to revert its direction of runs  
84 towards the mean position of the group. The same rule of behavioral modulation  
85 applies to cells of different phenotypes to allow them migrate at a consistent  
86 average speed with an ordered spatial arrangement of phenotypes. By titrating  
87 the phenotypes with different chemo-receptor abundance, we further  
88 demonstrated that the mean-reversion rate of the behavioral modulation depends  
89 on the sensitivity response to the chemoattractant gradient. Therefore, although  
90 the high-order computational abilities are not available to the simple organisms,  
91 the spatial modulation of stochastic behaviors at the individual level enables  
92 novel decision-making capabilities at the population level.

## 93 Results

94

### 95 Spatially ordered bacteria behavior.

96 To directly investigate how bacteria with different chemotactic abilities determine  
97 their relative positions within the collective migration group via run-and-tumble  
98 random motions, we employed a Y-shape microfluidic device with a long channel  
99 of 20mm which allows us to generate a stable propagating band of bacteria as  
100 previously reported (Fu et al., 2018, Saragosti et al., 2011). Specifically, about  
101  $1.5 \times 10^4$  *E. coli* wild type cells (strain RP437) were loaded into the device, and  
102 the medium used is M9 motility buffer supplemented with 200 $\mu$ M aspartate (Asp)  
103 as the only chemo-attractant in the system (Adler, 1966b, Fu et al., 2018). Under  
104 this condition, only one dense band of migrating bacteria can be spontaneously  
105 formed (Fu et al., 2018), after the cells were centrifuged to the tip of the long  
106 channel. To quantify the statistics of the single-cell motions within the dense  
107 traveling band, we premixed a small fraction of bacteria (strain JCY1) which  
108 constitutively expresses yellow fluorescent protein with the non-fluorescent wild  
109 type population (strain RP437) by 1:400. The trajectories of fluorescent cells  
110 were then recorded under 4X objective with a frame rate of 9 fps for 10 mins (see  
111 Materials and Methods and Fig S1). As the fluorescent labeled cells show the  
112 same behavior as the wild type ones (Fig S1D), we can consider the behavior of  
113 fluorescent cells as the representatives in the migrating group (Fu et al., 2018,  
114 Saragosti et al., 2011).

115 As an important advantage of the experimental setup, we can trace the single  
116 cell motions within the dense band of group migration for long time (e.g. typical  
117 tracks are larger than 300 seconds) (Saragosti et al., 2011). Given the long  
118 trajectories of fluorescent bacteria, we first observed an overall trend of biased  
119 random motions of individual cells towards the group migration (Movie. S1). By  
120 analyzing the instantaneous velocity based on the trajectories of fluorescent  
121 bacteria projected to the group migration direction  $x_i(t)$ , we found that the  
122 average instantaneous velocity of the entire group,  $V_G(t) = \langle \Delta x_i(t) / \Delta t \rangle$ , kept  
123 constant over time,  $V_G \sim 3.0 \mu\text{m/s}$ , suggesting that the band of cells as a whole  
124 propagates at a constant speed (Fig S2). Consequently, in the moving coordinate  
125 ( $z = x - V_G t$ ), the time-shifted cell density profiles  $\rho(z)$  can be superimposed as  
126 an approximately invariant profile (Fig 1B). Furthermore, the average  
127 instantaneous velocity over the band profile,  $V_I(z) = \langle \Delta x_i(z) / \Delta t \rangle$ , remained the  
128 same as the group velocity ( $V_G = \langle V_G(t) \rangle_t$ ) along the density profile (Fig 1B). We  
129 also verified that these observations did not depend on the sampling time interval  
130 (Fig S2). Therefore, despite of stochastic motions on single cell level, bacterial  
131 population are able to migrate as a stable group (Adler, 1966a, Fu et al., 2018,  
132 Saragosti et al., 2011).

133 Next, to address how the collective group movement emerge from the stochastic  
134 solitary behavior, we analyzed the statistics of run-and-tumble events for  
135 individual bacteria. Specifically, after identifying all the run states of individual  
136 trajectories by a previously described computer assistant program (see Materials  
137 and Methods) (Dufour et al., 2016, Waite et al., 2016), we aligned all the time-  
138 shifted runs by their starting positions in the moving coordinate with respect to  
139 the center of the group, and quantified the spatial distributions of the mean run  
140 duration  $\langle \tau_R(z) \rangle$ , as well as the mean run length  $\langle l_R(z) \rangle$ . We find that both  $\langle \tau_R(z) \rangle$   
141 and  $\langle l_R(z) \rangle$  increase from the back to the front of the moving group, while the  
142 mean tumble time  $\langle \tau_T(z) \rangle$  is almost invariant (Fig 1C). Note that previous  
143 observations on the steady state profiles of population distribution exhibited that  
144 phenotypes with low tumble bias would spontaneously position themselves in the  
145 front of the migratory group (Fu et al., 2018). Besides the phenotypic distribution  
146 along the wave profile, the spatial structure of run length/duration can also be  
147 contributed by the modulation of bacterial behaviors in response to the  
148 chemoattractant gradient (Dufour et al., 2014, Long, Zucker et al., 2017, Shimizu,  
149 Tu et al., 2010). It's unclear how the individual behaviors are dynamically  
150 modulated during the group migration.

151 To answer this question, we first investigated sample runs initiated from the back  
152 (B), middle (M) and front (F) of the migration group. Qualitatively, the lengths of  
153 representative runs in the front are longer but distribute more uniformly in terms  
154 of the directionality, whereas the lengths of runs in the back are shorter but the  
155 directions of runs are more likely pointing towards the direction of group  
156 migration (Fig 1D). Quantitatively, the statistics of run lengths, as well as the run  
157 durations, display exponential distributions, suggesting that the switch between  
158 runs and tumbles follow Poisson process (Berg & Brown, 1972, Wang, Shi et al.,  
159 2017). Of those distributions, the means in the direction of group migration are  
160 longer than that of the opposite direction (Fig 1E and Fig S3A). Furthermore, by  
161 analyzing the angular distribution of the run length, we found that in the front of  
162 the group, the difference between the forward runs and backward runs became  
163 smaller despite increased mean values (Fig 1F). Moreover, we also observed  
164 that the reorientation angles after tumble events exhibited a decreasing trend  
165 along the wave profile (Fig S3E), suggesting a directional persistence towards  
166 the group migration as previously reported (Saragosti et al., 2011). All these  
167 results suggest that the bacteria in the back run more effectively towards the  
168 group migration than those in the front.

169 To further quantify the efficiency of runs, we calculated the directional bias of run  
170 length and run duration, which are defined as the ratio of the net run  
171 length/duration in the direction of the group migration and run lengths/durations  
172 in all directions,  $B_l(z) \equiv \frac{\langle l_R(z) \cdot \cos \theta_R(z) \rangle}{\langle l_R(z) \rangle}$ , and  $B_\tau(z) \equiv \frac{\langle \tau_R(z) \cdot \cos \theta_R(z) \rangle}{\langle \tau_R(z) \rangle}$ , respectively,  
173 where  $\theta_R$  is the angle between single runs and the migration direction. Both  
174 quantities are spatially modulated as they decreased by 3~4 folds from the back

175 to the front of the migration group (Fig 1G), quantitatively indicating how much  
 176 more effectively the cells in the back behave than that in the front. As the tumble  
 177 duration is almost constant along the band profile (Fig 1C), we hypothesized that  
 178 the efficiency of runs would represent how fast that the cells climb the  
 179 chemoattractant gradient, suggesting that the spatial modulation in the directional  
 180 bias of runs enables cells in the back of the migration group to exhibit higher drift  
 181 velocity though the mean run length of them is shorter.

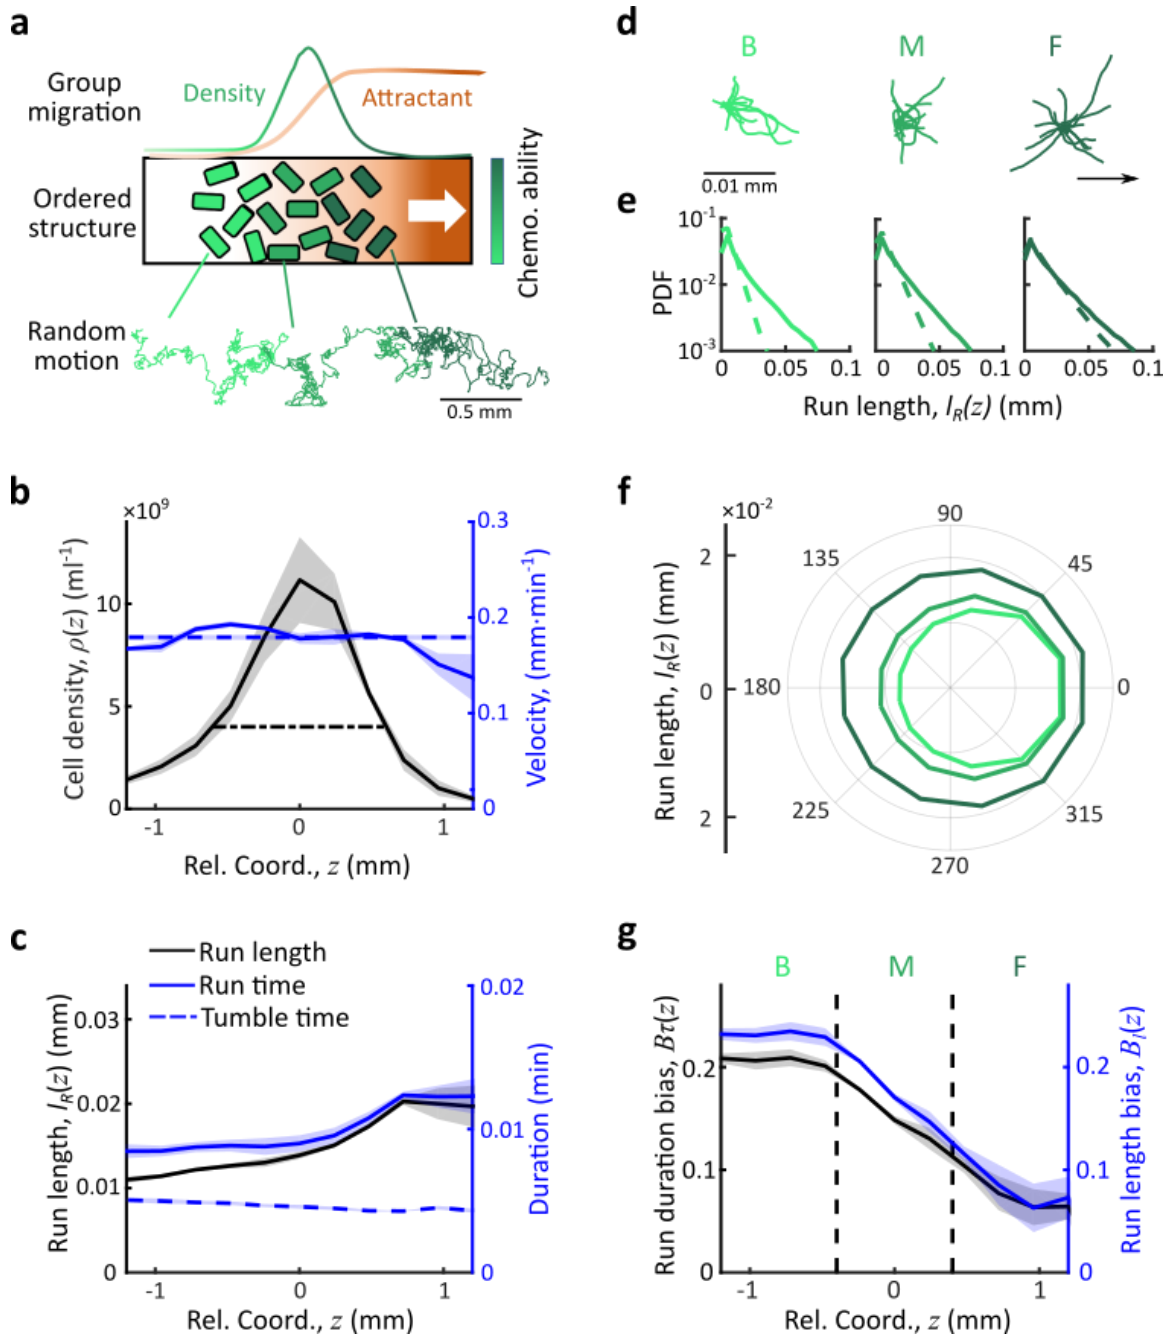

182

183 **Figure 1. Behavioral structure of individual bacteria in collective group**  
184 **migration.**

185 **(A)** Illustration of bacterial chemotactic group migration. Bacteria may form  
186 collective migrating group (green line) while consuming chemo-attractant  
187 collectively (brown line). Bacterial population of diverse phenotypes are sorted by  
188 their chemotactic abilities (increasing from light green to dark green) during  
189 collective migration following the self-generated attractant gradient (brown color).  
190 Meanwhile, as shown in the sample trajectories, individual cells perform run-and-  
191 tumble random motions biased towards the group migration. **(B)** In the moving  
192 coordinate  $z = x - V_G t$ , the bacteria density profile  $\rho(z)$  is stable (black solid  
193 line). The width of the density profile is defined as 2 times the standard deviation  
194 of bacterial relative position ( $2\sigma$ , black dash line), represented by the black dash-  
195 dotted line. The instantaneous velocity ( $V_I(z)$ ) (blue solid line) is uniform and  
196 equals to the average group velocity  $V_G$  (blue dash line). **(C)** The mean run length  
197  $\langle l_R(z) \rangle$  (black solid line) and run time  $\langle \tau_R(z) \rangle$  (blue solid line) increase from the  
198 back (left) to front (right) of the migration group, while the mean tumble time  
199  $\langle \tau_T(z) \rangle$  slightly decreases (blue dash line). **(D)** Sample runs of bacteria from the 3  
200 regions. B, M, and F stands for the back, middle and front of the migration group,  
201 respectively. Regions were defined by black dashed lines in G. Trajectories of  
202 runs show that cells in the back of group tend to run forward, compared to cells in  
203 other regions. **(E)** The exponential distribution of forward run length (solid lines)  
204 and backward run length (dash lines) in 3 regions show that the difference of run  
205 length between forward and backward for cells in the back is larger than cells in  
206 other regions. **(F)** The mean run length in different directions, with the angular bin  
207 size of  $15^\circ$ , also show that cells in the back were better skewed to run forward.  
208 **(G)** The run length bias  $B_l(z) = \frac{\langle l_R(z) \cdot \cos \theta_R(z) \rangle}{\langle l_R(z) \rangle}$  (black solid line) and the run time  
209 bias  $B_\tau(z) = \frac{\langle \tau_R(z) \cdot \cos \theta_R(z) \rangle}{\langle \tau_R(z) \rangle}$  (blue solid line) both decreased from the back to the  
210 front of the migration group, which is also consistent with results shown in D-F. In  
211 panel B, C, G, shaded area represents s.e.m. of 3 biological replicates. The  
212 spatial bin size is  $240\mu m$ .

213

214 **Bacteria perform mean-reversion behavior as active particles in moving**  
 215 **gradient.**

216 To verify our hypothesis, we examined the expected drift velocity along the band  
 217 profile, which is defined as the average projection of run length on the migration  
 218 direction over the average duration of runs and tumbles,  $V_D(z) \equiv \frac{\langle l_R(z) \cdot \cos \theta_R(z) \rangle}{\langle \tau_R(z) + \tau_T(z) \rangle}$   
 219 (Dufour et al., 2014). Unlike the spatially-uniform instantaneous velocity  $V_I(z)$ , the  
 220 expected drift velocity  $V_D(z)$  decreases linearly from the back to the front of the  
 221 migration group with a fitted linear slope of  $-r = -0.05 \text{ min}^{-1}$  (Fig 2A). The  
 222 negative slope of  $V_D(z)$  suggests a mean-reversion behavior of bacteria: the  
 223 bacteria in the back of the migration group are expected to drift faster than the  
 224 group ( $V_D > V_G$ ), enabling the cells to catch up within the group, while the cells in  
 225 the front are expected drift slower than the group ( $V_D < V_G$ ), making the cells to  
 226 slow down and fall back (Fig 2B). As another piece of evidence supporting the  
 227 mean-reversion behavior, the time-shifted trajectories of cells relative to the  
 228 group indicate that the cell motions perform sub-diffusive (Fig 2C), of which the  
 229 mean square displacement (MSD) are constrained over time (Fig S3G). Thus,  
 230 our observations indicate that the modulation of individual runs along the wave  
 231 profile leads to the spatially-structured expected drift velocity, resulting an  
 232 effective mean reversion process of cell motions.

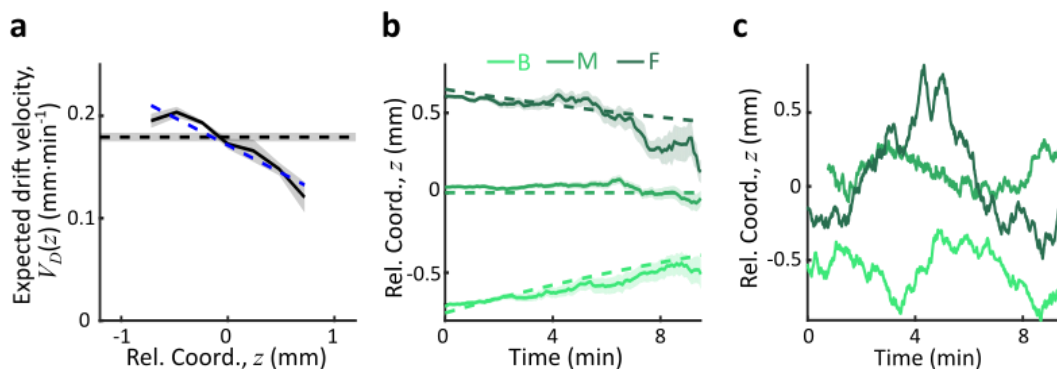

233 **Figure 2. Mean-reversion behavior of individual bacteria relative to the**  
 234 **group.**  
 235

236 (A) The expected drift velocity  $V_D = \frac{\langle l_R(z) \cdot \cos \theta_R(z) \rangle}{\langle \tau_R(z) + \tau_T(z) \rangle}$  (black solid line) decreases  
 237 from the back to the front of the migration group. The blue dash line is the linear  
 238 fit of the quantified experimental data, i.e.,  $V_D \approx -rz + V_{D0}$ , with  $r = 0.05 \text{ min}^{-1}$   
 239 and  $V_{D0} = 0.17 \text{ mm} \cdot \text{min}^{-1}$ .  $V_D$  crosses with the average group velocity  $V_G$  (black  
 240 dash line), which implies that bacteria perform mean-reversion motions, i.e. cells  
 241 in the back catch up the group while cells in the front lay back. The  $V_D$  curve and  
 242 its linear fit was cut to present  $\sim 90\%$  majority of cells ( $\pm 1.65\sigma$ ). (B) The time  
 243 evolution of the average expected position ( $z$ , solid lines) of cells starting from  
 244 the back (light green), middle (green), and front (dark green) of the migration  
 245 group (defined in Fig1. G). Shaded area represents s.e.m. of more than 450 cells



246 (see Methods). Analytically, the O-U type model predicts that  $z = C_0 e^{-rt} -$   
247  $(V_{D0} - V_G)/r$  (dash lines), where  $C_0$  can be fitted by the starting position (see  
248 Supplementary text). (C) Representative examples of single-cell trajectories (3  
249 colors represent 3 different tracks) showed the reversion behavior of bacteria  
250 around their mean positions.

251

252 To better understand how the spatial modulation of expected drift velocity  
253 emerges, we adopted a one-dimensional minimal model of bacterial behavior.  
254 The biased random motions of individual cells are described as an active  
255 Brownian particle in the low Reynolds number regime in the medium, following a  
256 Langevin type equation  $dx_i = V_{D,i}dt + \epsilon dW$  (Berg, 2004). In the stochastic  
257 velocity is modelled by a Gaussian random force  $\epsilon dW$  of which the variance  
258  $\epsilon$  depends on the effective diffusion coefficient of the cells (Rosen, 1973, Rosen,  
259 1974), while the deterministic velocity is the expected drifted velocity  $V_D =$   
260  $\chi g(x, t)$  that depends on two key parameters (Celani & Vergassola, 2010, de  
261 Gennes, 2004, Dufour et al., 2014, Si et al., 2012): the cell chemotactic ability,  $\chi$ ,  
262 and the perceived attractant gradient  $g(x, t)$  (Eq. S3). To calculate the perceived  
263 attractant gradient, we considered the dynamics of attractant concentration  
264  $S(x, t)$  as a diffusible small molecule that can be consumed by the cells (Eq. S2).  
265 Such stochastic description is equivalent to the classic Keller-Segel model (Keller  
266 & Segel, 1971, Rosen, 1973). For simplicity, we considered each cell has the  
267 same attractant consumption rate independent to the local cell density, and  
268 omitted the hydrodynamic forces and physical interactions among cells  
269 (Drescher, Dunkel et al., 2011, Fu et al., 2018, Saragosti et al., 2011). Using this  
270 particle-based model, 100,000 cells were simulated in one dimension. Starting  
271 with all cells in one end ( $x_i = 0$ ) and homogeneously distributed attractant field  
272 ( $S(x) = S_0$ ), a stable band of cells would spontaneously emerge by following a  
273 moving gradient of attractant that is generated by cell consumption for both  
274 single phenotype and multi-phenotypes (Fig S4). In the presence of diversity in  
275 cell chemotactic ability, the traveling band exhibits a sorted structure of  
276 phenotypes as previously observed (Fu et al., 2018). The self-generated  
277 perceived attractant gradient in the moving coordinate,  $g(z)$ , exhibits a stable  
278 profile that decreases from back to front.

279 In the moving coordinate, the Langevin type equation writes:  $dz_i = V_{D,i}dt -$   
280  $V_G dt + \epsilon dW$ . It tells us that the motion of each individual cell relative to the group  
281 migration can be considered as an active particle regulated by two 'effective  
282 forces': one generated by the decreasing trend of  $V_D$  which pushes the cell to  
283 catch up the wave; and another generated by the moving gradient of  $V_G$  which  
284 leaves the cell fall behind the wave. This mechanism constrains the random  
285 motions of cells, and enable cells with different phenotypes to form the spatially  
286 ordered structure spontaneously. Specifically, for cells with chemotactic ability  $\chi_i$ ,

287 the balance between the two ‘effective forces’ produces an effective potential  
288 well  $U(z) \propto \int_z^{+\infty} V_{D,i}(z) dz$  (Eq. S17).

289 The simulation results (Fig S4F) show that the perceived gradient  $g(z)$  is almost  
290 linear along the band profile. Thus, we further approximated  $g(z)$  as a linear  
291 function of  $z$  around the peak position:  $g(z) \approx g_0 + g_1 z$  with  $g_1 < 0$ , which gives  
292 us an analogy that cells follow an Ornstein-Uhlenbeck (OU) type process in the  
293 moving coordinate  $dz_i = \chi_i g_1 z dt + (\chi_i g_0 - V_G) dt + \epsilon dW$ . Solving this equation,  
294 we obtained that cells perform mean reversion motions around the mean  
295 positions  $z_0 = -\frac{g_0}{g_1} - \frac{V_G}{\chi_i |g_1|}$  with the reversion rate  $r = \left| \frac{dV_D(z)}{dz} \right| = \chi_i |g_1|$  (see  
296 Supplementary text). As a result, the run-and-tumble random motions of cells are  
297 constrained in the potential well, of which the minimum (the same as the mean  
298 position of cells,  $z_0$ ) increases with the chemotactic ability of the cells  $\chi_i$ . In  
299 addition, the standard deviation ( $\sigma$ ) of spatial distributions of cells, given by  
300  $\sigma = \frac{\epsilon}{\sqrt{2\chi_i |g_1|}}$ , decreases with  $\chi_i$ .

301 This analysis suggests that the spatial ordering of cells does not care how is the  
302 perceived moving gradient  $g(z)$  is generated, as long as the slope of it  $g_1 < 0$  is  
303 negative. Thus, we deduced a non-consumable moving attractant field ( $S(z)$ )  
304 from the measured density profile  $\rho(z)$  (Eq. S12), and simulated the behavior of  
305 cells following the Langevin type equation under this moving attractant field. As  
306 shown in Fig S5, cells with large enough  $\chi$  follows the moving attractant field and  
307 are spatially sorted as predicted by the OU type model.

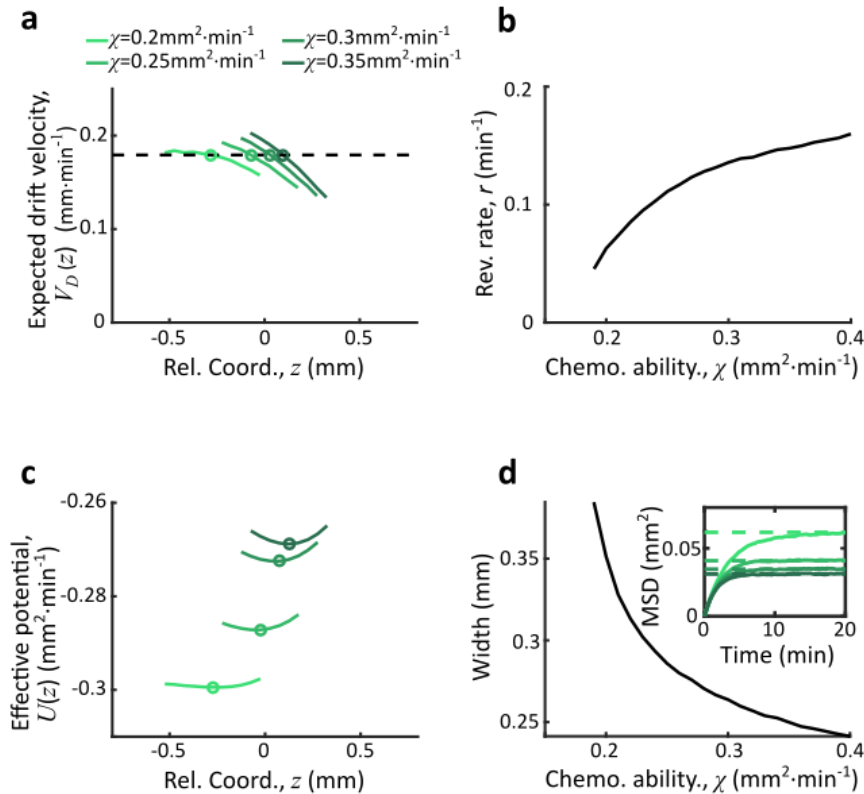

308

309 **Figure 3. Agent-based simulations recapture the ordered structure of**  
 310 **bacterial motions.**

311 (A) The expected drift velocity  $V_D(z)$  of simulated bacteria decreases from the  
 312 back to the front of the migration group, where the chemotactic ability  $\chi$  ranges  
 313 from 0.2 to 0.35 mm<sup>2</sup> · min<sup>-1</sup>, consistent with the experimental results shown in  
 314 Fig. 2a. The intersections between  $V_D$  curves with the preset group velocity  $V_G$   
 315 (black dashed line) shifts towards the back of the migration group as  $\chi$  decreases  
 316 (circles). Different colors of the lines and circles correspond to different  
 317 chemotactic abilities  $\chi$  as shown in the legend. The same color-coding also  
 318 applies to (B-D). (B) The reversion rate  $r_i = |dV_{D,i}(z)/dz|$  increases with the  
 319 chemotactic ability. (C) The effective potential well calculated by  $U_i(z) =$   
 320  $\int_z^{+\infty} V_{d,i}(z) dz$ . Positions of the potential minimum  $z_{min}$  are marked as circles. As  
 321 illustrated, for a lower chemotaxis ability  $\chi$ , the potential well is shallower and  $z_{min}$   
 322 shifts towards the back part of the migration group. (D) The width of the density  
 323 profile (measured by  $2\sigma$ , see Fig. 1B) decreases with the reversion rate  $r_i$  as well  
 324 as the chemotaxis ability  $\chi_i$ . The mean square displacement (MSD) of bacteria  
 325 (insert, solid lines) is bounded to  $2\sigma_i^2$  (insert, dash lines) (see Supplementary  
 326 text). In panel (A, C), curves were cut to present 90% majority of cells ( $z_{min} \pm$   
 327  $1.65\sigma_i$ ). More details of this simulation results were presented in Fig. S7.

328

## 329 **Ordered effective potential wells for bacteria of different phenotypes.**

330 To consolidate the proposed mechanism underlying the emergence of spatial  
331 orders from the individual random motions, we further performed simulations for  
332 cells of various chemotactic abilities integrated with the chemotactic pathway and  
333 multi-flagella competition. Together with the attractant dynamics  $S(x, t)$  described  
334 in Eq. S2, we performed stochastic simulations in three dimensions of a  
335 population with different chemotactic abilities  $\chi_i$ , where  $\chi_i$  was varied by tuning  
336 the receptor gain  $N$  (For details in Supplementary text)(Dufour et al., 2014, Jiang,  
337 Qi et al., 2010, Sneddon, Pontius et al., 2012). As the receptor gain only affects  
338 the amplification factor that a cell responds to the gradient, the variation of  
339 bacterial motility  $\epsilon$  is unchanged. As a result, a dense band of migrating cells that  
340 follow a self-generated moving attractant chemoattractant gradient via  
341 consumption were recaptured as experiments (Fig S6). To better analysis the  
342 simulations, we then simplified the model by the assumption of a non-  
343 consumable attractant profile  $S(z)$  moving along the group migration direction  
344 (Fig S5A). Using this simplified model, we first checked that mean positions of  
345 density profiles of cells with different receptor gain  $N$ , as well as their peaks, were  
346 orderly aligned in respect to chemotactic ability  $\chi_i$ .

347 As an important advantage of the agent-based simulations, the model allows us  
348 to analyze the single cell behavior during the ordered group migrations. For each  
349 phenotype  $i$ , the expected drift velocity  $V_{D,i}(z)$  decreases along the density profile  
350 (Fig 3A). Consistent with the ordered structure of density profiles, the intersection  
351 between  $V_{D,i}(z)$  and  $V_G$  exhibits the same sorted order of chemotactic ability  $\chi_i$   
352 (Fig S7). As the reversion rate  $r_i = \left| \frac{dV_{D,i}(z)}{dz} \right|$  shows a positive correlation to  $\chi_i$ ,  
353 cells with lower receptor gain  $N$  (resulting smaller  $\chi$ ) experience a weaker  
354 reverting force towards centers (Fig 3B). Thus, the effective moving potential,  
355  $U_i(z)$ , which constrains the cells round mean positions sorted by their  
356 chemotactic abilities, becomes flat for cells with lower chemotaxis ability  $\chi$  (Fig  
357 3C) (Long, 2019). As a result, cells of each phenotype perform as sub-diffusion,  
358 of which the MSD along the migration coordinate relative to the group are  
359 bounded at the level negatively correlated to  $\chi$  (Fig 3D). We further obtain similar  
360 results for populations of different  $\chi_i$  through adaptation time  $\tau$ , or basal CheY  
361 protein level  $Y_{p0}$  which determines the basic tumble bias  $TB_0$  (Dufour et al., 2014,  
362 Jiang et al., 2010, Sneddon et al., 2012) (Fig S8).

363 To verify the model predictions on the individual behavior of different phenotypes,  
364 we experimentally measured the trajectories of cells with different chemotactic  
365 abilities during the group migration. Specifically, we altered the chemotaxis  
366 abilities of cells by titrating the expression level of Tar, which is under the control  
367 of a small molecule inducer aTc (Sourjik & Berg, 2004, Zheng, Ho et al., 2016)  
368 (see Materials and Methods and Fig 4A). The variations on the expression of Tar  
369 would lead different receptor gains in response to the Asp gradient (Adler, 1966b,

370 Adler, 1969, Tu, 2013), but the tumble bias and growth rate will not change (Fig  
371 S9). The tar-titrated cells labeled with yellow fluorescent protein (strain JCY20),  
372 were added into wild type population by the ratio of 1 in 400. Within the wild type  
373 population, 1 in 50 cells were labeled with red fluorescent protein (strain JCY2).  
374 As the tar-titrated strain is a small portion of the pre-mixed population, we can  
375 consider the density profile of the population is invariant to different inductions of  
376 tar. The premixed population can generate a collective group migration as the  
377 wild type population does (Fig S9). The trajectories of YFP labeled cells were  
378 tracked to represent the behavior of cells with different chemotactic abilities,  
379 while the profile of wild type cells with RFP was also measured to characterize  
380 the density distribution of the entire migratory population.

381 By comparing the statistics of cells with different Tar expression levels, we found  
382 that the expected drift velocity  $V_{D,i}(z)$  followed the same decreasing pattern from  
383 back to front (Fig 4B). More importantly, as the Tar-level (chemotactic ability)  
384 increases, the slope of the decreasing pattern increases, which is consistent to  
385 the model prediction shown in Fig 3A. The intersections between  $V_{D,i}(z)$  and  $V_G$ ,  
386 as well as the peak positions and mean positions of each tar-titrated density  
387 profiles (Fig 4C), shift toward the front as the chemotactic ability increases  
388 (measured by migration rate on agar plate (Cremer et al., 2019, Liu, Cremer et  
389 al., 2019)). The  $V_D$  cross point is always behind the peak position and the mean  
390 position (Fig 4C), suggesting that cells are leaking behind. Moreover, the width of  
391 each tar-titrated density profile (defined by  $2\sigma_i$ ) decreases as the reversion rate  $r_i$   
392 increases (Fig 4D), consistent with the model results in Fig 3C. Thus, as the O-U  
393 type model predicts, the width of the density profile is controlled by the reversion  
394 rate determined by the chemotactic ability  $\chi_i$ .

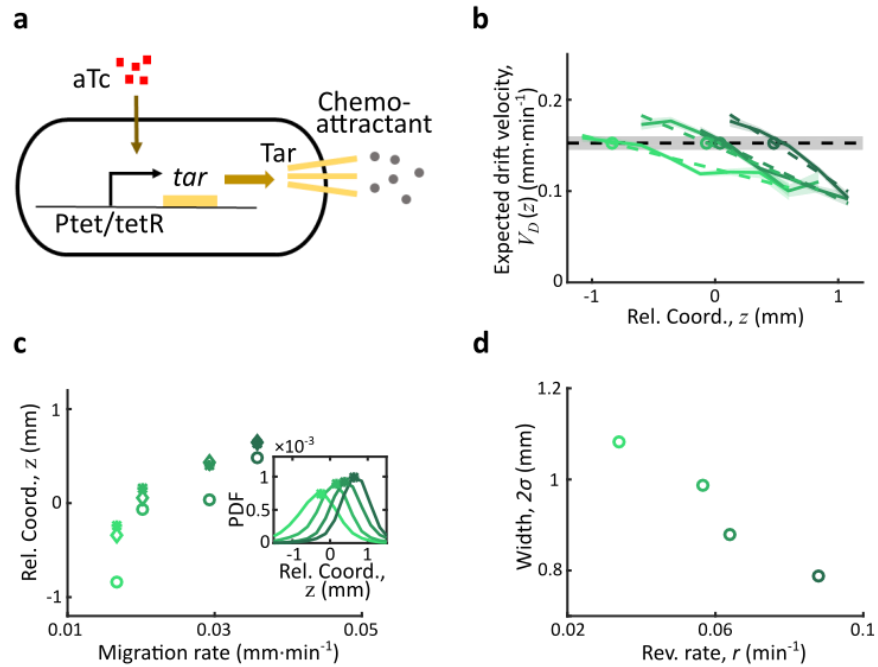

395

396 **Figure 4. Spatial ordered structure emerged from behavioral modulation of**  
 397 **cells with different chemoreceptors.**

398 (A) Genetic circuit of the Tar titratable strain. In the experiments, the expression  
 399 level of Tar (a chemo-attractant receptor protein) was titrated by the  
 400 concentration of external inducer (aTc). The chemotactic ability  $\chi$  of bacteria is  
 401 then determined by the expression level of Tar (41). (B) The expected drift  
 402 velocity  $V_{D,i}(z)$  of Tar titratable strain JCY20 (colored solid line) were spatially  
 403 modulated. All of them decrease from the back to the front of the migration group  
 404 and intersect with the group migration velocity  $V_G \approx 0.15\text{mm}/\text{min}$  (black dash  
 405 line). The linear fits of  $V_{D,i}(z)$  (colored dash lines) intersect with  $V_G$  at positions  
 406 (circles) determined by the corresponding Tar expression level. Colors from dark  
 407 to light green corresponds to inducer (aTc) concentration to be  $[1, 3, 6, 20]\text{ ng}/$   
 408  $\text{mL}$ . The black shaded area of  $V_G$  represents s.d. of 4 experiments, while the  
 409 colored shaded area of  $V_D$  curves presents s.e.m. of counted runs. (C) In the  
 410 experiment, the positions of  $V_{D,i}(z) - V_G$  intersections (circles, illustrated in B),  
 411 together with the peaks (stars, illustrated in the insert figure) and the average  
 412 positions (diamond) of bacteria density profiles all shift towards the front of the  
 413 migration group for strains with the higher Tar-expression level, which has a  
 414 higher chemotactic ability and migrate faster on agar plates (x-axis, see Method  
 415 & Fig. S9). The related density profiles (PDF) were shown in the insert plot and  
 416 the color-coding of lines/symbols in both panel C and D is the same as that in B.  
 417 (D) The width of density profiles ( $2\sigma$ ) of Tar-titrated bacteria decreases with the  
 418 reversion rate  $r$ .  
 419

## 420 Discussion

421 In summary, coordinated behaviors with ordered spatial arrangements of  
422 phenotypes are abundant in a wide range of biological and human-engineered  
423 systems and are believed to involve elaborate control mechanisms. For animal  
424 migrations, it is challenging to characterize simultaneously the computational  
425 strategy and behavior at individual levels so as to avoid averaging out phenotypic  
426 diversity, and the emergent behavior at population level (Couzin et al., 2005,  
427 Couzin et al., 2002, Vicsek & Zafeiris, 2012). Using bacterial chemotactic  
428 migration as a model system, we demonstrate that individual bacteria can  
429 spatially modulate their stochastic behaviors to perform mean reversion random  
430 motions around centers sequentially aligned by their chemotactic abilities,  
431 enabling a constant migration speed and ordered spatial arrangement of  
432 phenotypes at the collective level. Individual cells harness their own chemotactic  
433 system, together with collective consumption of attractant, to achieve the  
434 behavioral modulation, such that the system transits from solitary to collective  
435 behaviors. This strategy of self-organization does not require sophisticated  
436 communications (Curatolo, Zhou et al., 2020, Karig, Martini et al., 2018, Liu, Fu  
437 et al., 2011, Payne, Li et al., 2013) nor other hydrodynamic interactions (Chen,  
438 Liu et al., 2017, Drescher et al., 2011, Zhang, Be'er et al., 2010) among  
439 individuals.

440 The behavior modulation depends on the chemotactic ability of individual, which  
441 is controlled by well-determined chemotaxis-related proteins. Among them, we  
442 experimentally identified the abundance of the receptor protein Tar affects  
443 linearly the reversion rate and the width of dispersion. Simulation results  
444 suggest other key proteins that determine the basal tumble bias and the  
445 adaptation time may also affect the behavior modulation (Fig S8).

446 In the migratory group, the same rule of behavioral modulation applies to cells  
447 with different phenotypes, such that the random motions of cells are bounded by  
448 moving potential wells whose basins are sequentially aligned. However, it is  
449 noteworthy that cells could skip the potential wells from the back (Long, 2019),  
450 resulting in leakage of cells in the migratory group (Holz & Chen, 1978,  
451 Novick-Cohen & Segel, 1984, Scribner, Segel et al., 1974). Phenotypes with  
452 weaker chemotactic abilities locate at the back of the group, where the effective  
453 potential well is shallower (Fig 3C), have more chance left to skip. Thus, such  
454 collective migration selects bacteria with higher chemotactic abilities (Liu et al.,  
455 2019).

456 The simple computational principle of behavioral modulation to allocate different  
457 phenotypes in the collective group is likely not limited to sensing the self-  
458 generated signal by consumption of attractant. Prominent examples are trail-  
459 following migration (Couzin & Krause, 2003, Helbing, Keltsch et al., 1997), a  
460 typical class of collective behavior, a modified Langevin type model, where

461 individuals tracing the accumulated signal secreted by all participants (Eq. S20),  
 462 can reproduce similar spatiotemporal dynamics of behavioral modulation as well  
 463 as ordered arrangements of phenotypes in the migratory group (Fig S10). Thus,  
 464 this mechanism of matching individual abilities by the signal strength might  
 465 provide an explanation of how other higher organisms organize ordered  
 466 structures during group migration.

467

468 **Table 1. Summary of quantities**

| Quantities  | Definition                     | Formulations                                                                                           |
|-------------|--------------------------------|--------------------------------------------------------------------------------------------------------|
| $V_G$       | Group velocity                 | $V_G = \langle \frac{dx}{dt} \rangle$                                                                  |
| $z$         | Moving coordinate              | $z = x - V_G t$                                                                                        |
| $V_I(z)$    | Instantaneous velocity         | $V_I(z) = \langle \frac{dx(z)}{dt} \rangle$                                                            |
| $B_\tau(z)$ | Run time bias                  | $B_\tau(z) = \frac{\langle \tau_R(z) \cdot \cos \theta_R(z) \rangle}{\langle \tau_R(z) \rangle}$       |
| $B_l(z)$    | Run length bias                | $B_l(z) = \frac{\langle l_R(z) \cdot \cos \theta_R(z) \rangle}{\langle l_R(z) \rangle}$                |
| $V_D(z)$    | Expected drift velocity        | $V_D(z) = \frac{\langle L_R(z) \cdot \cos \theta_R(z) \rangle}{\langle \tau_R(z) + \tau_T(z) \rangle}$ |
| $\rho(z)$   | Cell density                   | $\rho(z) = \frac{\sum i(z)}{a \cdot \Delta z}$                                                         |
| $S(z)$      | Chemo-attractant concentration | $-V_G \frac{dS}{dz} = D_s \frac{\partial^2 S}{\partial z^2} - k\rho$                                   |
| $g(z)$      | Perceived gradient             | $g(z) = \frac{d \ln \left( \frac{1+S(z)/K_{off}}{1+S(z)/K_{on}} \right)}{dz}$                          |

469



## 470 **Materials and Methods**

### 471 **Strains**

472 The wild type strain *Escherichia coli* (RP437) and its mutants used in this study  
473 were used in this study, where all plasmids were kindly provided by Dr. Chenli  
474 Liu. Specifically, the tar-titratable strain was constructed by recombineering  
475 according to a previous research (Zheng et al., 2016). Specifically, the DNA  
476 cassette of the *Ptet-tetR-tar* feedback loop was amplified and inserted into the  
477 chromosomal *attB* site by recombineering with the aid of plasmid *pSim5*. The *tar*  
478 gene at the native locus was seamlessly replaced with the *aph* gene by using the  
479 same recombineering protocol. To color-code the strains, we use plasmids with  
480 chloramphenicol resistant gene carrying YFP under constitutive promoter (for  
481 JCY1 strain) and *pLambda* driven mRFP1 plasmids maintained by kanamycin  
482 (For JCY2). To color-code tar-titratable strain (JCY20), a plasmid carrying YFP  
483 chloramphenicol resistant gene were transformed into constructed tar-titratable  
484 strain.

### 485 **Media and growth conditions**

486 For bacterial culture, the M9 supplemented medium was used. The preparation  
487 of the M9 supplemented medium follows the recipe in previous study (Fu et al.,  
488 2018): 1×M9 salts, supplemented with 0.4% (v/v) glycerol, 0.1% (w/v) casamino  
489 acids, 1.0mM magnesium sulfate, and 0.05% (w/v) polyvinylpyrrolidone-40.  
490 1×M9 salts were prepared to be 5×M9 salts stock solution: 33.9g · L<sup>-1</sup> Na<sub>2</sub>HPO<sub>4</sub>,  
491 15g · L<sup>-1</sup> KH<sub>2</sub>PO<sub>4</sub>, 2.5g · L<sup>-1</sup> NaCl, 5.0g · L<sup>-1</sup> NH<sub>4</sub>Cl.

492 For migration experiments in the micro-channel, the M9 motility buffer was used.  
493 The recipe was: 1×M9 salts, supplemented with 0.4% (v/v) glycerol, 1.0mM  
494 magnesium sulfate, and 0.05% (w/v) polyvinylpyrrolidone-40, 0.1mM EDTA,  
495 0.01mM Methionine, and supplemented with 200μM aspartic acid.

496 For the migration rate measurements, the M9 amino acid medium with 0.2%  
497 (w/v) agar was used to prepare swim plate(Liu et al., 2019). The recipe was:  
498 1×M9 salts, supplemented with 0.4% (v/v) glycerol, 1× amino acid, 200μM  
499 aspartic acid, 1.0mM magnesium sulfate, and 0.05% (w/v) polyvinylpyrrolidone-  
500 40. 1× amino acid were prepared to be 5× amino acid stock solution: 4mM  
501 alanine, 26mM arginine (HCl), 0.5mM cysteine (HCl · H<sub>2</sub>O), 3.3mM glutamic  
502 acid(K salt), 3mM glutamine, 4mM glycine, 1mM histidine (HCl · H<sub>2</sub>O), 2mM  
503 isoleucine, 4mM leucine, 2mM lysine, 1mM methionine, 2mM phenylalanine,  
504 2mM proline, 2mM threonine, 0.5mM tryptophane, 1mM tyrosine, 3mM valine. All  
505 experiments were carried out at 30 °C. Plasmids were maintained by 50 μg · mL<sup>-1</sup>  
506 kanamycin or 25 μg · mL<sup>-1</sup> chloramphenicol.

### 507 **Sample preparation**

508 The bacteria from frozen stock was streaked onto the standard Luria-Bertani (LB)  
509 agar plate with 2% (w/v) agar and cultured at 37°C overnight. 3-5 separate  
510 colonies were picked and inoculated in 2mL M9 supplemented medium for  
511 overnight culture with corresponded antibiotics to maintain plasmids. The  
512 overnight culture was diluted by 1:100 into 2mL M9 supplemented medium the  
513 next morning. For Tar titration strains, related aTc were added in this step. When  
514 the culture OD600 reaches 0.2-0.25, it was then diluted into pre-warmed 15mL  
515 M9 supplemented medium so that the final OD600 was about 0.05 (Liu et al.,  
516 2019, Zheng, Bai et al., 2020, Zheng et al., 2016).

517 Bacteria were washed with the M9 motility buffer and were re-suspended in fresh  
518 M9 motility buffer to concentrate cell density at OD600 about 1.0. Then, the wild  
519 type strain and fluorescent strain were mixed with ratio of 400:1 before loaded in  
520 the microfluidic chamber (Fu et al., 2018, Saragosti et al., 2011). For Tar titration  
521 experiments, the wild type strain (RP437) was mixed with two fluorescent strains  
522 (JCY2 & JCY20) by 400:8:1.

## 523 **Microfabrication**

524 The microfluidic devices were fabricated with the same protocol and the same  
525 design as previous research (Bai, Gao et al., 2018, Fu et al., 2018), except that  
526 the capillary channel was designed longer than that of previous ones. The size of  
527 the main channel was 20mm × 0.6mm × 0.02mm and only one gate at the end of  
528 the channel was kept (Fig S1A).

## 529 **Band formation**

530 Sample of mixed cells with density OD600 ≈ 1.0 was gently loaded into the  
531 microfluidic device and then the device was spun for 15min at 3000rpm in an  
532 30 °C environmental room so that almost  $1 \sim 1.5 \cdot 10^5$  cells were placed to the end  
533 of the channel. After spinning, the microfluidic device was placed on an inverted  
534 microscope (Nikon Ti-E) equipped with a custom environmental chamber set to  
535 50% humidity and 30 °C.

## 536 **Imaging**

537 The microscope and its automated stage were controlled by a custom MATLAB  
538 script via the  $\mu$ Manager interface (Edelstein, Tsuchida et al., 2014, Fu et al.,  
539 2018). A 4X objective (Nikon CFI Plan Fluor DL4X F, N.A. 0.13, W.D. 16.4 mm,  
540 PhL) was placed in the wave front and the fluorescent bacteria, seen as  
541 randomly picked samples of the migrating group, were captured continuously in  
542 10 mins until they leave the view. Time-lapsed images with YFP fluorescence of  
543 the migrating cells were acquired by a ZYLA 4.2MP Plus CL10 camera (2048 ×  
544 2048 array of  $6.5 \times 6.5 \mu\text{m}$  pixels) at 9 frames/s (fps) through. A LED illuminator

545 (0034R-X-Cite 110LED) and an EYFP block (Chroma 49003; Ex: ET500/X 20,  
546 Em: ET535/30 m) compose the lightening system.

547 For the Tar titration experiments, the channel was first scanned with 10X  
548 objective (CFI Plan Fluor DL 10X A, N.A. 0.30, W.D. 15.2mm, PH-1) enlighten by  
549 a LED illuminator (0034R-X-Cite 110LED) through the RFP block (Chroma  
550 49005, Ex: ET545/X 30, Em: ET620/60 m) and EYFP block channels for 7  
551 neighbored views around the migration group. These images were further  
552 combined to 2 large pictures of the RFP fluorescent strains and YFP fluorescent  
553 strains. The channel was scanned twice, respectively before and after the 10  
554 mins tracking of fluorescent Tar titrated cells.

### 555 **Tracks extraction and state assignment**

556 The acquired movie was first analyzed with the U-track software package to  
557 identify bacteria and to get their trajectories (Jaqaman, Loerke et al., 2008). Then  
558 the tracks were labeled by run state and tumble state by a custom MATLAB  
559 package (Waite et al., 2016) using a previously described clustering algorithm  
560 (Dufour et al., 2016).

### 561 **Track analysis**

562 The group velocity  $V_G$  was calculated by averaging the frame to frame velocity  
563 ( $dt \approx 0.11s$ ) over all tracks and all time. The cell number for the first frame over a  
564 spatial bin of  $\Delta x = 60\mu m$  and a channel section  $a = 12000\mu m^2$  were calculated to  
565 get the density profile  $\rho(x, t = 0) = \frac{\sum_i(x,t)}{a \cdot dx}$ . The peak position of the first frame  
566 ( $x_{peak}(t = 0)$ ) was then determined by the maximum of  $\rho(x, t = 0)$ . The position  
567 of each bacterium ( $x_i(t)$ ) was transformed to moving coordinate position  $z_i$  by the  
568 group velocity  $V_G$  and origin of the axis on the density peak by  $z_i = x_i(t) - V_G t -$   
569  $x_{peak}(t = 0)$ . Given the relative position of each cell, we recalculated the density  
570 profile in moving coordinate  $\rho(z) = \frac{\sum_i(z)}{a \cdot dx}$ . The width of the density profile was  
571 defined by two times the standard deviation of relative positions  $2\sigma =$   
572  $2\sqrt{\frac{1}{n-1} \sum_{i=1}^n (z_i - \langle z \rangle)^2}$ . The spatial distribution of the instantaneous velocities  
573  $\langle V_I(z) \rangle$  were calculated by averaging the velocity in spatial bin of  $\Delta z = 240\mu m$ .

574 A tumble-run event is the minimal element of bacterial behavior. The typical  
575 spatial scale of a tumble-run event is about  $20\mu m$ , which is much smaller than  
576 the spatial bin size chosen in this study ( $240\mu m$ ). The spatial distributions of run  
577 time  $\langle \tau_R(z) \rangle$ , tumble time  $\langle \tau_T(z) \rangle$  and run length  $\langle l_R(z) \rangle$  were calculated by  
578 averaging the related values of all the events with tumbling position ( $z_T$ ) located  
579 in each spatial bin ( $z$ ). As the displacement of tumble is small, the tumbling  
580 position is approximately the starting position of runs. For each tumble-run event,

581 we have the vector linking starting position and end position of the run. The  
582 running angle  $\theta_R$  is then defined by the angle between run direction and the  
583 group migration direction. One can easily deduce all the other quantities with the  
584 formulations in Table 1.

### 585 **Growth rate and migration rate measurement**

586 Growth rates of Tar-titrated strains were calculated from exponential fitting  
587 ( $R^2 > 0.99$ ) over measured curves of cell density (OD600) with respect to time. A  
588 250 mL flask with 20 mL M9 supplement medium were used. All measurements  
589 were performed in a vibrator of rotation rate of 150 rpm at 30°C. OD600 was  
590 measured by a spectrophotometer reader every 25 min. Each strain has been  
591 measured for at least three times.

592 The semi-solid agar plate was illuminated from bottom by a circular white LED  
593 array with a light box as described previously (Liu et al., 2011, Liu et al., 2019,  
594 Wolfe & Berg, 1989) and was imaged at each 2 hours by a camera located on  
595 the top. As bacteria swimming in the plate forms 'Adler ring', we used the first  
596 maximal cell density from the edge to define the moving edge of bacterial  
597 chemotaxis. The migration rate was then calculated from a linear fit over the data  
598 of edge positions in respect to time ( $R^2 > 0.99$ ).

### 599 **Models and simulations**

600 Details of the theoretical models and numerical simulations were presented in the  
601 appendix notes. In which, the Langevin equation was deduced and solved  
602 numerically with a particle-based simulation; the approximated OU type equation  
603 and its traveling wave solution was deduced; an agent-based simulation of  
604 bacterial with chemotaxis pathway was performed.

605 **Acknowledgments**

606 The authors acknowledge C.Liu, for sharing E.coli strains and plasmids; S.  
607 Huang for help with the microfluidics; T. Emonet for help with single cell tracking  
608 and agent-based simulations; T. Hwa, F. Jin, L. Luo, J. Long for insightful  
609 discussions. This work was financially supported by the National Key R&D  
610 Program of China (2018YFA0903400), the National Natural Science Foundation  
611 of China (32071417), CAS Interdisciplinary Innovation Team (JCTD-2019-16),  
612 Guangdong Provincial Key Laboratory of Synthetic Genomics  
613 (2019B030301006), Shenzhen Peacock Plan (KQTD2016112915000294) to  
614 X.F., the National Natural Science Foundation of China (11804355, 31770111),  
615 the Guangdong Provincial Natural Science Foundation (2018A030310010),  
616 Shenzhen Grant (JCYJ20170413153329565) to Y.B..

617

618 **Author contributions:** X.F. initiated and directed the research. C.H. constructed  
619 strains, fabricated micro-fluidics and tracked bacterial motions. Y.B. analyzed  
620 data, performed the particle-based simulations and the agent-based simulations.  
621 Y.B., X.L., and X.F. analyzed the results and mathematical modelling. All authors  
622 contribute in writing the manuscript.

623

624 **Competing interests:** The authors declare no competing interests.

625

626 **Data and materials availability:** All data needed to evaluate the conclusions in  
627 the paper are present in the paper and/or the Supplementary Materials. Codes  
628 for bacterial tracking and agent-based simulation were presented in previous  
629 papers and were modified with details presented in the Appendix. The OU model  
630 were simulated with Matlab and related codes were available on line:  
631 [https://github.com/BaiYangBqdq/spatial\\_modulation\\_in\\_group\\_migration](https://github.com/BaiYangBqdq/spatial_modulation_in_group_migration)

632 **References**

633

634 Adler J (1966a) Chemotaxis in Bacteria. *Science* 153: 708-716

635 Adler J (1966b) Effect of Amino Acids and Oxygen on Chemotaxis in *Escherichia*  
636 *Coli*. *J Bacteriol* 92: 121-129

637 Adler J (1969) Chemoreceptors in bacteria. *Science* 166: 1588-97

638 Bai Y, Gao M, Wen L, He C, Chen Y, Liu C, Fu X, Huang S (2018) Applications  
639 of Microfluidics in Quantitative Biology. *Biotechnol J* 13: e1700170

640 Berg HC (2004) *E. coli* in motion. Springer-Verlag, New York

641 Berg HC, Brown DA (1972) Chemotaxis in *Escherichia coli* analysed by three-  
642 dimensional tracking. *Nature* 239: 500-4

643 Celani A, Vergassola M (2010) Bacterial strategies for chemotaxis response. *P*  
644 *Natl Acad Sci USA* 107: 1391-1396

645 Chen C, Liu S, Shi XQ, Chate H, Wu YL (2017) Weak synchronization and large-  
646 scale collective oscillation in dense bacterial suspensions. *Nature* 542: 210-  
647 214

648 Couzin ID, Krause J (2003) Self-organization and collective behavior in  
649 vertebrates. *Adv Stud Behav* 32: 1-75

650 Couzin ID, Krause J, Franks NR, Levin SA (2005) Effective leadership and  
651 decision-making in animal groups on the move. *Nature* 433: 513-516

652 Couzin ID, Krause J, James R, D.Ruxton G, Franks NR (2002) Collective  
653 Memory and Spatial Sorting in Animal Groups. *J theor Biol* 218: 1--11

654 Cremer J, Honda T, Tang Y, Wong-Ng J, Vergassola M, Hwa T (2019)  
655 Chemotaxis as a navigation strategy to boost range expansion. *Nature* 575:  
656 658-663

657 Curatolo AI, Zhou N, Zhao Y, Liu C, Daerr A, Tailleur J, Huang J (2020)  
658 Cooperative pattern formation in multi-component bacterial systems through  
659 reciprocal motility regulation. *Nature Physics*

660 de Gennes PG (2004) Chemotaxis: the role of internal delays. *Eur Biophys J* 33:  
661 691-3

662 Drescher K, Dunkel J, Cisneros LH, Ganguly S, Goldstein RE (2011) Fluid  
663 dynamics and noise in bacterial cell-cell and cell-surface scattering. *Proc*  
664 *Natl Acad Sci U S A* 108: 10940-10945

665 Dufour YS, Fu X, Hernandez-Nunez L, Emonet T (2014) Limits of Feedback  
666 Control in Bacterial Chemotaxis. *PLoS Computational Biology* 10

667 Dufour YS, Gillet S, Frankel NW, Weibel DB, Emonet T (2016) Direct Correlation  
668 between Motile Behavior and Protein Abundance in Single Cells. *Plos*  
669 *Computational Biology* 12

670 Edelstein AD, Tsuchida MA, Amodaj N, Pinkard H, Vale RD, Stuurman N (2014)  
671 Advanced methods of microscope control using muManager software. *J Biol*  
672 *Methods* 1

673 Frankel NW, Pontius W, Dufour YS, Long J, Hernandez-Nunez L, Emonet T  
674 (2014) Adaptability of non-genetic diversity in bacterial chemotaxis. *Elife* 3

- 675 Fu X, Kato S, Long J, Mattingly HH, He C, Vural DC, Zucker SW, Emonet T  
676 (2018) Spatial self-organization resolves conflicts between individuality and  
677 collective migration. *Nat Commun* 9: 1-12
- 678 Helbing D, Keltsch J, Molnar P (1997) Modelling the evolution of human trail  
679 systems. *Nature* 388: 47-50
- 680 Holz M, Chen SH (1978) Quasi-Elastic Light-Scattering from Migrating  
681 Chemotactic Bands of *Escherichia-Coli*. *Biophys J* 23: 15-31
- 682 Jaqaman K, Loerke D, Mettlen M, Kuwata H, Grinstein S, Schmid SL, Danuser G  
683 (2008) Robust single-particle tracking in live-cell time-lapse sequences. *Nat*  
684 *Methods* 5: 695-702
- 685 Jiang LL, Qi OY, Tu YH (2010) Quantitative Modeling of *Escherichia coli*  
686 Chemotactic Motion in Environments Varying in Space and Time. *Plos*  
687 *Computational Biology* 6
- 688 Karig D, Martini KM, Lu T, DeLateur NA, Goldenfeld N, Weiss R (2018)  
689 Stochastic Turing patterns in a synthetic bacterial population. *Proc Natl Acad*  
690 *Sci U S A* 115: 6572-6577
- 691 Keller EF, Segel LA (1971) Model for chemotaxis. *Journal of Theoretical Biology*  
692 30: 225-234
- 693 Krause J (1994) Differential fitness returns in relation to spatial position in  
694 groups. *Biol Rev Camb Philos Soc* 69: 187-206
- 695 Krause J, Ruxton GD, Ruxton G, Ruxton IG (2002) *Living in Groups*. Oxford  
696 University Press,
- 697 Kussell E, Leibler S (2005) Phenotypic diversity, population growth, and  
698 information in fluctuating environments. *Science* 309: 2075-2078
- 699 Liu C, Fu X, Liu L, Ren X, Chau CK, Li S, Xiang L, Zeng H, Chen G, Tang LH,  
700 Lenz P, Cui X, Huang W, Hwa T, Huang JD (2011) Sequential establishment  
701 of stripe patterns in an expanding cell population. *Science* 334: 238-41
- 702 Liu WR, Cremer J, Li DJ, Hwa T, Liu CL (2019) An evolutionarily stable strategy  
703 to colonize spatially extended habitats. *Nature* 575: 664-668
- 704 Long J (2019) *From Individual to Collective Behavior: The Role of Memory and*  
705 *Diversity in Bacterial Navigation*. In Yale University
- 706 Long J, Zucker SW, Emonet T (2017) Feedback between motion and sensation  
707 provides nonlinear boost in run-and-tumble navigation. *PLoS Computational*  
708 *Biology* 13: 1-25
- 709 Novickcohen A, Segel LA (1984) A Gradually Slowing Traveling Band of  
710 Chemotactic Bacteria. *J Math Biol* 19: 125-132
- 711 Parrish JK, Edelstein-Keshet L (1999) Complexity, pattern, and evolutionary  
712 trade-offs in animal aggregation. *Science* 284: 99-101
- 713 Partridge BL (1982) The structure and function of fish schools. *Sci Am* 246: 114-  
714 23
- 715 Payne S, Li B, Cao Y, Schaeffer D, Ryser MD, You L (2013) Temporal control of  
716 self-organized pattern formation without morphogen gradients in bacteria.  
717 *Mol Syst Biol* 9: 697
- 718 Rosen G (1973) Fundamental theoretical aspects of bacterial chemotaxis.  
719 *Journal of Theoretical Biology* 41: 201-208

- 720 Rosen G (1974) On the propagation theory for bands of chemotactic bacteria.  
721 *Mathematical Biosciences* 20: 185-189
- 722 Saragosti J, Calvez V, Bournaveas N, Perthame B, Buguin A, Silberzan P (2011)  
723 Directional persistence of chemotactic bacteria in a traveling concentration  
724 wave. *Proc Natl Acad Sci U S A* 108: 16235-40
- 725 Scribner TL, Segel LA, Rogers EH (1974) Numerical Study of Formation and  
726 Propagation of Travelling Bands of Chemotactic Bacteria. *Journal of*  
727 *Theoretical Biology* 46: 189-219
- 728 Shimizu TS, Tu Y, Berg HC (2010) A modular gradient- sensing network for  
729 chemotaxis in *Escherichia coli* revealed by responses to time- varying  
730 stimuli. *Molecular systems biology* 6: 382
- 731 Si G, Wu T, Qi O, Tu Y (2012) Pathway-based mean-field model for *Escherichia*  
732 *coli* chemotaxis. *Physical Review Letters* 109: 0-4
- 733 Sneddon MW, Pontius W, Emonet T (2012) Stochastic coordination of multiple  
734 actuators reduces latency and improves chemotactic response in bacteria.  
735 *Proc Natl Acad Sci U S A* 109: 805-810
- 736 Sourjik V, Berg HC (2004) Functional interactions between receptors in bacterial  
737 chemotaxis. *Nature* 428: 437-441
- 738 Spudich JL, Koshland DE (1976) Non-genetic individuality: Chance in the single  
739 cell. *Nature* 262: 467--471
- 740 Sumpter DJT (2010) *Collective Animal Behavior*. Princeton Univ. Press,  
741 Tu Y (2013) Quantitative modeling of bacterial chemotaxis: signal amplification  
742 and accurate adaptation. *Annu Rev Biophys* 42: 337-59
- 743 Vicsek T, Zafeiris A (2012) Collective motion. *Phys Rep* 517: 71-140
- 744 Waite AJ, Frankel NW, Dufour YS, Johnston JF, Long J, Emonet T (2016) Non-  
745 genetic diversity modulates population performance. *Molecular Systems*  
746 *Biology* 12: 895
- 747 Waite AJ, Frankel NW, Emonet T (2018) Behavioral Variability and Phenotypic  
748 Diversity in Bacterial Chemotaxis. *Annu Rev Biophys* 47: 595-616
- 749 Wang F, Shi H, He R, Wang R, Zhang R, Yuan J (2017) Non-equilibrium effect in  
750 the allosteric regulation of the bacterial flagellar switch. *Nature Physics* 13:  
751 710-714
- 752 Wolfe AJ, Berg HC (1989) Migration of Bacteria in Semisolid Agar. *Proc Natl*  
753 *Acad Sci U S A* 86: 6973-6977
- 754 Zhang HP, Be'er A, Florin EL, Swinney HL (2010) Collective motion and density  
755 fluctuations in bacterial colonies. *Proc Natl Acad Sci U S A* 107: 13626-  
756 13630
- 757 Zheng H, Bai Y, Jiang M, Tokuyasu TA, Huang X, Zhong F, Wu Y, Fu X,  
758 Kleckner N, Hwa T, Liu C (2020) General quantitative relations linking cell  
759 growth and the cell cycle in *Escherichia coli*. *Nat Microbiol*
- 760 Zheng H, Ho PY, Jiang M, Tang B, Liu W, Li D, Yu X, Kleckner NE, Amir A, Liu C  
761 (2016) Interrogating the *Escherichia coli* cell cycle by cell dimension  
762 perturbations. *Proc Natl Acad Sci U S A* 113: 15000-15005

763
